# Supplementary material
Source: MDPI journal article supplement (https://www.mdpi.com/1999-4907/13/2/287)
Supplement: s1 [file s1]

Correlation coefficient between measured and calculated traits of *Juniperus turbinata* from the three populations.

\*significance at level p=0.05; \*\*significance at level p=0.01.

|                                                                              | Recta number of cones (4 or 6) | Length of cone (mm) | Diameter of cone (mm)<br>"average of 2 independent measures of angle of 90°" | Number of scales of cone | Number of leaves per 5mm section of ultimate lateral shoot | Thickness of the ultimate lateral shoot and leaves (mm) | Number of seeds | Length of seeds (mm) | Width of seeds(mm) | Length/Dia meter (of cone) | Length/width (of seed) | Cone diameter/number of seeds | Cone diameter/width of seeds | Thickness of shoot/number of leaves | Cone diameter/recta number of cone | Cone length/number of leaves | Cone number of scales/cone length |
|------------------------------------------------------------------------------|--------------------------------|---------------------|------------------------------------------------------------------------------|--------------------------|------------------------------------------------------------|---------------------------------------------------------|-----------------|----------------------|--------------------|----------------------------|------------------------|-------------------------------|------------------------------|-------------------------------------|------------------------------------|------------------------------|-----------------------------------|
| Recta number of cones (4 or 6)                                               | 1                              | -0.19**             | -0.160**                                                                     | 0.22                     | 0.20                                                       | -0.10**                                                 | 0.18**          | -0.24**              | -0.13**            | -0.04                      | -0.09**                | -0.22**                       | 0.007                        | -0.18**                             | -0.08**                            | -0.25**                      | 0.03**                            |
| Length of cone (mm)                                                          | -0.19**                        | 1                   | 0.81**                                                                       | 0.22                     | -0.22**                                                    | 0.27                                                    | -0.02           | 0.74**               | 0.35**             | 0.23                       | 0.28                   | 0.36                          | 0.16**                       | 0.30                                | 0.05**                             | 0.07**                       | -0.55                             |
| Diameter of cone (mm)<br>"average of 2 independent measures of angle of 90°" | -0.16**                        | 0.81**              | 1                                                                            | 0.22                     | -0.26**                                                    | 0.29                                                    | -0.006          | 0.07**               | 0.38**             | -0.32                      | 0.28                   | 0.41                          | 0.32                         | 0.35                                | 0.05**                             | 0.06**                       | -0.41**                           |
| Number of scales of cone                                                     | 0.22                           | 0.22                | 0.22                                                                         | 1                        | 0.08*                                                      | 0.07*                                                   | 0.20**          | 0.09**               | 0.02               | -0.01                      | 0.06                   | -0.05                         | 0.12**                       | 0.001                               | -0.04                              | 0.08*                        | 0.06**                            |
| Number of leaves per 5mm section of ultimate lateral shoot                   | 0.20                           | -0.22**             | -0.26**                                                                      | 0.08*                    | 1                                                          | -0.17**                                                 | 0.04**          | -0.35**              | -0.16**            | 0.05                       | -0.16**                | -0.44**                       | -0.02                        | -0.07**                             | -0.29**                            | -0.07**                      | 0.22                              |
| Thickness of the ultimate lateral shoot and leaves (mm)                      | -0.10**                        | 0.27                | 0.29                                                                         | 0.07*                    | -0.17**                                                    | 1                                                       | -0.18**         | 0.30                 | 0.15**             | -0.02                      | 0.13**                 | 0.28                          | 0.05                         | 0.06**                              | 0.21                               | 0.28                         | -0.13**                           |
| Number of seeds                                                              | 0.18**                         | -0.02               | -0.006                                                                       | 0.20**                   | 0.04**                                                     | -0.18**                                                 | 1               | -0.35**              | -0.27**            | -0.02                      | -0.03                  | -0.82**                       | 0.28                         | -0.38**                             | -0.15**                            | -0.27**                      | 0.17**                            |
| Length of seeds (mm)                                                         | -0.24**                        | 0.74**              | 0.07**                                                                       | 0.09**                   | -0.35**                                                    | 0.30                                                    | -0.35**         | 1                    | 0.05**             | 0.01                       | 0.38                   | 0.06**                        | -0.06                        | 0.40                                | 0.54                               | 0.07**                       | -0.46**                           |
| Width of seeds(mm)                                                           | -0.13**                        | 0.35**              | 0.38**                                                                       | 0.02                     | -0.16**                                                    | 0.15**                                                  | -0.27**         | 0.05**               | 1                  | 0.03                       | -0.50**                | 0.36                          | -0.67**                      | 0.19**                              | 0.28                               | 0.34                         | -0.26                             |
| Length/Diameter (of cone)                                                    | -0.04                          | 0.23                | -0.32                                                                        | -0.01                    | 0.05                                                       | -0.02                                                   | -0.02           | 0.01                 | 0.03               | 1                          | 0.001                  | -0.09**                       | -0.26**                      | -0.05                               | -0.11**                            | 0.11**                       | -0.18**                           |
| Length/width (of seed)                                                       | -0.09**                        | 0.28                | 0.28                                                                         | 0.06                     | -0.16**                                                    | 0.13**                                                  | -0.03           | 0.38                 | -0.50**            | 0.001                      | 1                      | 0.17**                        | 0.07**                       | 0.18**                              | 0.21                               | 0.28                         | -0.14**                           |
| Cone diameter/number of seeds                                                | -0.22**                        | 0.36                | 0.41                                                                         | -0.05                    | -0.44**                                                    | 0.28                                                    | -0.82**         | 0.06**               | 0.36               | -0.09**                    | 0.17**                 | 1                             | -0.08*                       | 0.46                                | 0.37                               | 0.05**                       | -0.31**                           |
| Cone diameter/width of seeds                                                 | 0.007                          | 0.16**              | 0.32                                                                         | 0.12**                   | -0.02                                                      | 0.05                                                    | 0.28            | -0.06                | -0.67**            | -0.26**                    | 0.07**                 | -0.08*                        | 1                            | 0.04                                | 0.13**                             | 0.12**                       | -0.017                            |
| Thickness of shoot/number of leaves                                          | -0.18**                        | 0.30                | 0.35                                                                         | 0.001                    | -0.07**                                                    | 0.06**                                                  | -0.38**         | 0.40                 | 0.19**             | -0.05                      | 0.18**                 | 0.46                          | 0.04                         | 1                                   | 0.31                               | 0.06**                       | -0.21**                           |
| Cone diameter/recta number of cone                                           | -0.08**                        | 0.05**              | 0.05**                                                                       | -0.04                    | -0.29**                                                    | 0.21                                                    | -0.15**         | 0.54                 | 0.28               | -0.11**                    | 0.21                   | 0.37                          | 0.13**                       | 0.31                                | 1                                  | 0.05**                       | -0.42**                           |
| Cone length/number of leaves                                                 | -0.25**                        | 0.07**              | 0.06**                                                                       | 0.08*                    | -0.07**                                                    | 0.28                                                    | -0.27**         | 0.07**               | 0.34               | 0.11**                     | 0.28                   | 0.05**                        | 0.12**                       | 0.06**                              | 0.05**                             | 1                            | -0.49**                           |
| Cone number of scales/cone length                                            | 0.03**                         | -0.55               | -0.41**                                                                      | 0.06**                   | 0.22                                                       | -0.13**                                                 | 0.17**          | -0.46**              | -0.26              | -0.18**                    | -0.14**                | -0.31**                       | -0.01                        | -0.21**                             | -0.42**                            | -0.49**                      | 1                                 |
