# Supplementary material
Source: MDPI journal article supplement (https://www.mdpi.com/1999-4907/13/2/287)
Supplement: s1 [file s1]

Geographical coordinates of sampled shrubs of *Juniperus turbinata*. The three sites are located in the North Eastern Morocco.

| Shrub number | Coastline<br>site1 in Saidia; Berkane district |             | Semi-continental<br>Site 2in Jerada district |             | Continental<br>Site 3 in Figuig district |             |
|--------------|------------------------------------------------|-------------|----------------------------------------------|-------------|------------------------------------------|-------------|
|              | Latitude                                       | Longitude   | Latitude                                     | Longitude   | Latitude                                 | Longitude   |
| 1            | 2.25618098                                     | 35.09379451 | 1.88933852                                   | 34.42123946 | 1.637551                                 | 32.228192   |
| 2            | 2.25728771                                     | 35.09385666 | 1.88841791                                   | 34.42051635 | 1.648229                                 | 32.225098   |
| 3            | 2.2761144                                      | 35.10050587 | 1.88837336                                   | 34.41766811 | 1.644433                                 | 32.223271   |
| 4            | 2.27707316                                     | 35.10026284 | 1.88884335                                   | 34.41630936 | 1.639662                                 | 32.218724   |
| 5            | 2.2839508                                      | 35.10283483 | 1.88701454                                   | 34.41738244 | 1.640354                                 | 32.218767   |
| 6            | 2.28643555                                     | 35.10160728 | 1.88659042                                   | 34.41536416 | 1.657002321                              | 32.22354728 |
| 7            | 2.28936285                                     | 35.10474205 | 1.88151367                                   | 34.41497079 | 1.661789182                              | 32.22360427 |
| 8            | 2.320226628                                    | 35.1142633  | 1.88230911                                   | 34.41673052 | 1.666291111                              | 32.22463002 |
| 9            | 2.32458273                                     | 35.11518471 | 1.88155844                                   | 34.41610112 | 1.664638504                              | 32.2263966  |
| 10           | 2.32637341                                     | 35.11651928 | 1.88169482                                   | 34.41780716 | 1.663555762                              | 32.22896099 |
| 11           | 2.292369458                                    | 35.10376332 | 1.88089196                                   | 34.41852202 | 1.664182613                              | 32.23038565 |
| 12           | 2.289130334                                    | 35.10203076 | 1.88162094                                   | 34.41871914 | 1.661675209                              | 32.2314684  |
| 13           | 2.278584349                                    | 35.10142814 | 1.88111751                                   | 34.41895045 | 1.656489443                              | 32.23118346 |
| 14           | 2.291842158                                    | 35.10594784 | 1.88019043                                   | 34.4192959  | 1.653070257                              | 32.23112648 |
| 15           | 2.322425514                                    | 35.11333003 | 1.88076537                                   | 34.41974915 | 1.650961759                              | 32.22918894 |
| 16           | 2.322952813                                    | 35.11566522 | 1.88330481                                   | 34.42033164 | 1.645434074                              | 32.22765031 |
| 17           | 2.327321864                                    | 35.11543923 | 1.88436085                                   | 34.42171454 | 1.646117911                              | 32.22531386 |
| 18           | 2.257052022                                    | 35.09488832 | 1.88477913                                   | 34.42161727 | 1.64309763                               | 32.22588373 |
| 19           | 2.259800489                                    | 35.09580447 | 1.88146131                                   | 34.41811352 | 1.642470779                              | 32.22742236 |
| 20           | 2.265602809                                    | 35.09672063 | 1.8811323                                    | 34.41817011 | 1.63990639                               | 32.22622564 |
| 21           | 2.26621358                                     | 35.09473562 | 1.88108132                                   | 34.4187585  | 1.637057068                              | 32.22343331 |
| 22           | 2.274840713                                    | 35.09756044 | 1.88059073                                   | 34.41923358 | 1.636430217                              | 32.22582674 |
| 23           | 2.287056124                                    | 35.10435526 | 1.88131361                                   | 34.41878898 | 1.636145285                              | 32.22047001 |
| 24           | 2.307058858                                    | 35.10947046 | 1.88019043                                   | 34.4192959  | 1.641331051                              | 32.22092591 |
| 25           | 2.258349909                                    | 35.09504101 | 1.88038075                                   | 34.41915125 | 1.651987515                              | 32.2234903  |
| 26           | 2.285452851                                    | 35.10374449 | 1.8803807                                    | 34.4191515  | 1.651873542                              | 32.22582674 |
| 27           | 2.324313125                                    | 35.11366951 | 1.880190435                                  | 34.41929595 | 1.654096013                              | 32.22582674 |
| 28           | 2.321488311                                    | 35.11534913 | 1.8888433                                    | 34.4163093  | 1.654096013                              | 32.22822017 |
